# Supplementary material for: An Adaptive Partial Least-Squares Regression Approach for Classifying Chicken Egg Fertility by Hyperspectral Imaging
Source: MDPI journal article supplement (doi:10.3390/s24051485), 2024-02-24
Supplement: s1 [file s1]

**Table S1.** Percent classification accuracy for brown eggs based on 5 PLS components.

| INC.<br>DAY  | THRESH. | FP | FN | TP | TN  | TPR (%) | TNR (%) | OVA (%) |
|--------------|---------|----|----|----|-----|---------|---------|---------|
| <b>Day 0</b> | 0.5     | 0  | 23 | 0  | 312 | 0       | 100     | 93.13   |
| F = 312      | 0.55    | 0  | 23 | 0  | 312 | 0       | 100     | 93.13   |
| NF = 23      | 0.60    | 0  | 23 | 0  | 312 | 0       | 100     | 93.13   |
| T = 335      | 0.65    | 0  | 23 | 0  | 312 | 0       | 100     | 93.13   |
|              | 0.70    | 0  | 23 | 0  | 312 | 0       | 100     | 93.13   |
|              | 0.75    | 0  | 23 | 0  | 312 | 0       | 100     | 93.13   |
|              | 0.80    | 0  | 23 | 0  | 312 | 0       | 100     | 93.13   |
|              | 0.81    | 0  | 23 | 0  | 312 | 0       | 100     | 93.13   |
|              |         |    |    |    |     |         |         |         |
| <b>Day 1</b> | 0.5     | 0  | 23 | 0  | 311 | 0       | 100     | 93.11   |
| F = 311      | 0.55    | 0  | 23 | 0  | 311 | 0       | 100     | 93.11   |
| NF = 23      | 0.60    | 0  | 23 | 0  | 311 | 0       | 100     | 93.11   |
| T = 334      | 0.65    | 0  | 23 | 0  | 311 | 0       | 100     | 93.11   |
|              | 0.70    | 0  | 23 | 0  | 311 | 0       | 100     | 93.11   |
|              | 0.75    | 0  | 23 | 0  | 311 | 0       | 100     | 93.11   |
|              | 0.79    | 0  | 23 | 0  | 311 | 0       | 100     | 93.11   |
|              | 0.80    | 0  | 23 | 0  | 311 | 0       | 100     | 93.11   |
|              |         |    |    |    |     |         |         |         |
| <b>Day 2</b> | 0.5     | 0  | 23 | 0  | 311 | 0       | 100     | 93.11   |
| F = 311      | 0.55    | 0  | 23 | 0  | 311 | 0       | 100     | 93.11   |
| NF = 23      | 0.60    | 0  | 23 | 0  | 311 | 0       | 100     | 93.11   |
| T = 334      | 0.65    | 0  | 23 | 0  | 311 | 0       | 100     | 93.11   |
|              | 0.70    | 0  | 23 | 0  | 311 | 0       | 100     | 93.11   |
|              | 0.75    | 0  | 22 | 1  | 311 | 4.35    | 100     | 93.41   |
|              | 0.79    | 1  | 22 | 1  | 310 | 4.35    | 99.68   | 93.11   |
|              | 0.80    | 1  | 22 | 1  | 310 | 4.35    | 99.68   | 93.11   |
|              |         |    |    |    |     |         |         |         |
| <b>Day 3</b> | 0.5     | 0  | 23 | 0  | 311 | 0       | 100     | 93.11   |
| F = 311      | 0.55    | 0  | 22 | 1  | 311 | 4.35    | 100     | 93.41   |
| NF = 23      | 0.60    | 1  | 22 | 1  | 310 | 4.35    | 99.68   | 93.11   |
| T = 334      | 0.65    | 1  | 22 | 1  | 310 | 4.35    | 99.68   | 93.11   |
|              | 0.70    | 1  | 22 | 1  | 310 | 4.35    | 99.68   | 93.11   |
|              | 0.75    | 1  | 20 | 3  | 310 | 13.04   | 99.68   | 93.71   |
|              | 0.79    | 4  | 19 | 4  | 307 | 17.39   | 98.71   | 93.11   |
|              | 0.80    | 4  | 19 | 4  | 307 | 17.39   | 98.71   | 93.11   |
|              |         |    |    |    |     |         |         |         |
| <b>Day 4</b> | 0.5     | 0  | 20 | 3  | 311 | 13.04   | 100     | 94.01   |
| F = 311      | 0.55    | 1  | 19 | 4  | 310 | 17.39   | 99.68   | 94.01   |
| NF = 23      | 0.60    | 1  | 18 | 5  | 310 | 21.74   | 99.68   | 94.31   |
| T = 334      | 0.65    | 1  | 17 | 6  | 310 | 26.09   | 99.68   | 94.61   |
|              | 0.70    | 2  | 17 | 6  | 309 | 26.09   | 99.36   | 94.31   |
|              | 0.75    | 2  | 15 | 8  | 309 | 34.78   | 99.36   | 94.91   |
|              | 0.79    | 5  | 15 | 8  | 306 | 34.78   | 98.39   | 94.01   |
|              | 0.80    | 8  | 14 | 9  | 303 | 39.13   | 97.43   | 93.41   |

**Table S2.** Percent classification accuracy for white eggs based on 5 PLS components.

| INC.<br>DAY  | THRESH. | FP | FN | TP | TN  | TPR (%) | TNR (%) | OVA (%) |
|--------------|---------|----|----|----|-----|---------|---------|---------|
| <b>Day 0</b> | 0.5     | 0  | 21 | 0  | 314 | 0       | 100     | 93.73   |
| F = 314      | 0.55    | 0  | 21 | 0  | 314 | 0       | 100     | 93.73   |
| NF = 21      | 0.60    | 0  | 21 | 0  | 314 | 0       | 100     | 93.73   |
| T = 335      | 0.65    | 0  | 21 | 0  | 314 | 0       | 100     | 93.73   |
|              | 0.70    | 0  | 21 | 0  | 314 | 0       | 100     | 93.73   |
|              | 0.75    | 0  | 21 | 0  | 314 | 0       | 100     | 93.73   |
|              | 0.80    | 3  | 20 | 1  | 311 | 4.76    | 99.04   | 93.13   |
|              | 0.81    | 4  | 20 | 1  | 310 | 4.76    | 98.73   | 92.84   |
|              |         |    |    |    |     |         |         |         |
| <b>Day 1</b> | 0.5     | 0  | 21 | 0  | 314 | 0       | 100     | 93.73   |
| F = 314      | 0.55    | 0  | 21 | 0  | 314 | 0       | 100     | 93.73   |
| NF = 21      | 0.60    | 0  | 21 | 0  | 314 | 0       | 100     | 93.73   |
| T = 335      | 0.65    | 0  | 21 | 0  | 314 | 0       | 100     | 93.73   |
|              | 0.70    | 0  | 21 | 0  | 314 | 0       | 100     | 93.73   |
|              | 0.75    | 0  | 21 | 0  | 314 | 0       | 100     | 93.73   |
|              | 0.80    | 1  | 21 | 0  | 313 | 0       | 99.68   | 93.43   |
|              | 0.82    | 3  | 21 | 0  | 311 | 0       | 99.04   | 92.84   |
|              |         |    |    |    |     |         |         |         |
| <b>Day 2</b> | 0.5     | 0  | 21 | 0  | 314 | 0       | 100     | 93.73   |
| F = 314      | 0.55    | 0  | 21 | 0  | 314 | 0       | 100     | 93.73   |
| NF = 21      | 0.60    | 0  | 21 | 0  | 314 | 0       | 100     | 93.73   |
| T = 335      | 0.65    | 0  | 21 | 0  | 314 | 0       | 100     | 93.73   |
|              | 0.70    | 0  | 21 | 0  | 314 | 0       | 100     | 93.73   |
|              | 0.75    | 0  | 21 | 0  | 314 | 0       | 100     | 93.73   |
|              | 0.80    | 1  | 20 | 1  | 313 | 4.76    | 99.68   | 93.73   |
|              | 0.82    | 5  | 18 | 3  | 309 | 14.29   | 98.41   | 93.13   |
|              |         |    |    |    |     |         |         |         |
| <b>Day 3</b> | 0.5     | 0  | 21 | 0  | 312 | 0       | 100     | 93.69   |
| F = 312      | 0.55    | 0  | 21 | 0  | 312 | 0       | 100     | 93.69   |
| NF = 21      | 0.60    | 0  | 21 | 0  | 312 | 0       | 100     | 93.69   |
| T = 333      | 0.65    | 0  | 21 | 0  | 312 | 0       | 100     | 93.69   |
|              | 0.70    | 1  | 20 | 1  | 311 | 4.76    | 99.68   | 93.69   |
|              | 0.75    | 2  | 19 | 2  | 310 | 9.52    | 99.36   | 93.69   |
|              | 0.79    | 7  | 18 | 3  | 305 | 14.29   | 97.76   | 92.49   |
|              | 0.80    | 8  | 18 | 3  | 304 | 14.29   | 97.44   | 92.19   |
|              |         |    |    |    |     |         |         |         |
| <b>Day 4</b> | 0.5     | 1  | 14 | 7  | 311 | 33.33   | 99.68   | 95.50   |
| F = 312      | 0.55    | 1  | 14 | 7  | 311 | 33.33   | 99.68   | 95.50   |
| NF = 21      | 0.60    | 1  | 13 | 8  | 311 | 38.10   | 99.68   | 95.80   |
| T = 333      | 0.65    | 4  | 10 | 11 | 308 | 52.38   | 98.72   | 95.80   |
|              | 0.70    | 5  | 10 | 11 | 307 | 52.38   | 98.40   | 95.50   |
|              | 0.75    | 8  | 7  | 14 | 304 | 66.67   | 97.44   | 95.50   |
|              | 0.79    | 10 | 7  | 14 | 302 | 66.67   | 96.79   | 94.89   |
|              | 0.80    | 12 | 7  | 14 | 300 | 66.67   | 96.15   | 94.29   |
